# Supplementary material for: β-Cryptoxanthin Maintains Mitochondrial Function by Promoting NRF2 Nuclear Translocation to Inhibit Oxidative Stress-Induced Senescence in HK-2 Cells
Source: MDPI journal article supplement (doi:10.3390/ijms24043851), 2023-02-14
Supplement: s1 [file s1]

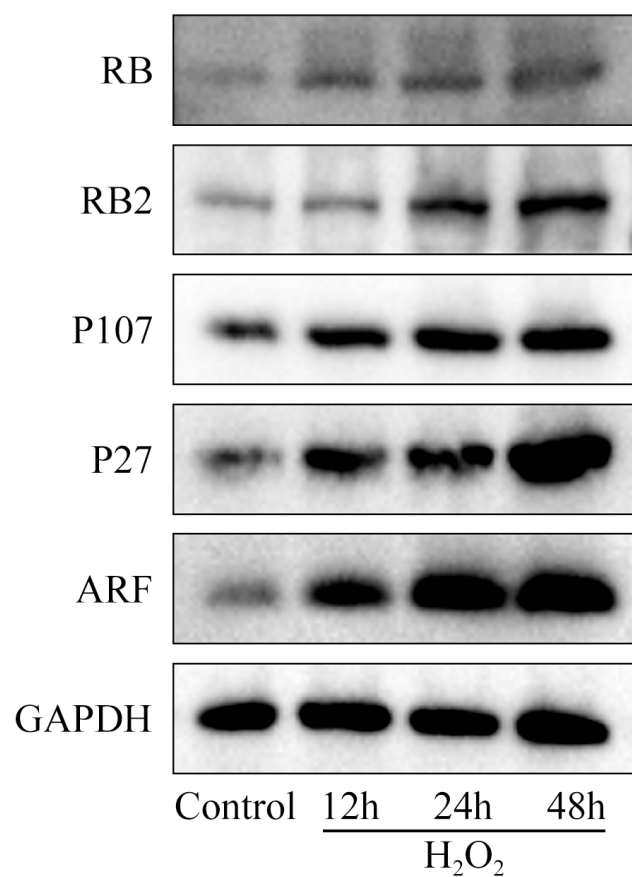

**Supplementary Figure S1. The expression levels of senescence-related proteins.** HK-2 cells were treated with 800  $\mu$ M  $H_2O_2$  for 12, 24, and 48 h. Western blot detection of protein expression of senescence-related proteins RB, RB2, P107, P27, and ARF.

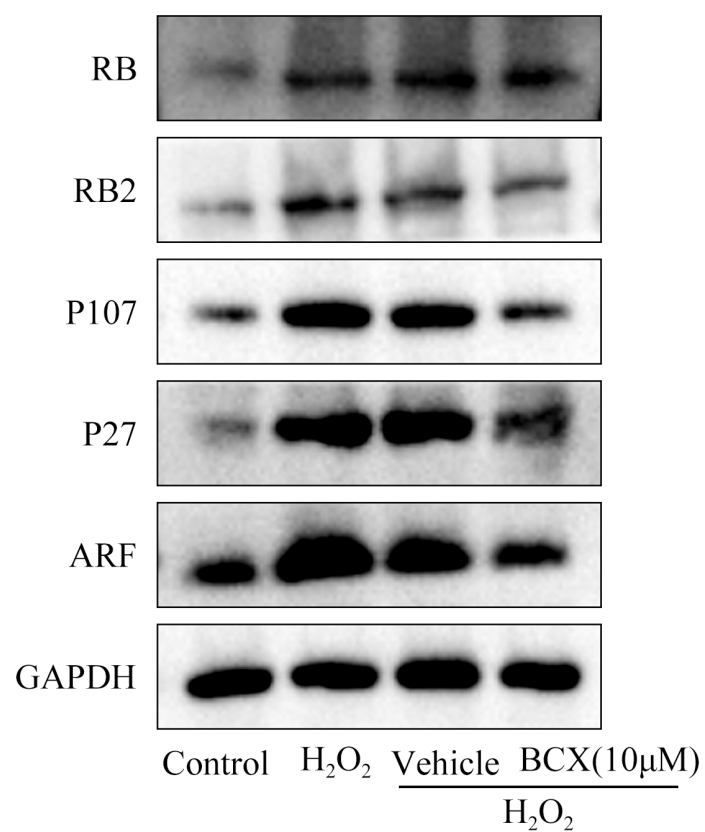

**Supplementary Figure S2. The expression levels of senescence-related proteins.** After pretreatment with BCX (10 μM) for 24 h, HK-2 cells were treated with 800 μM H<sub>2</sub>O<sub>2</sub> for 48 h. Western blot detection of protein expression of senescence-related proteins RB, RB2, P107, P27, and ARF.

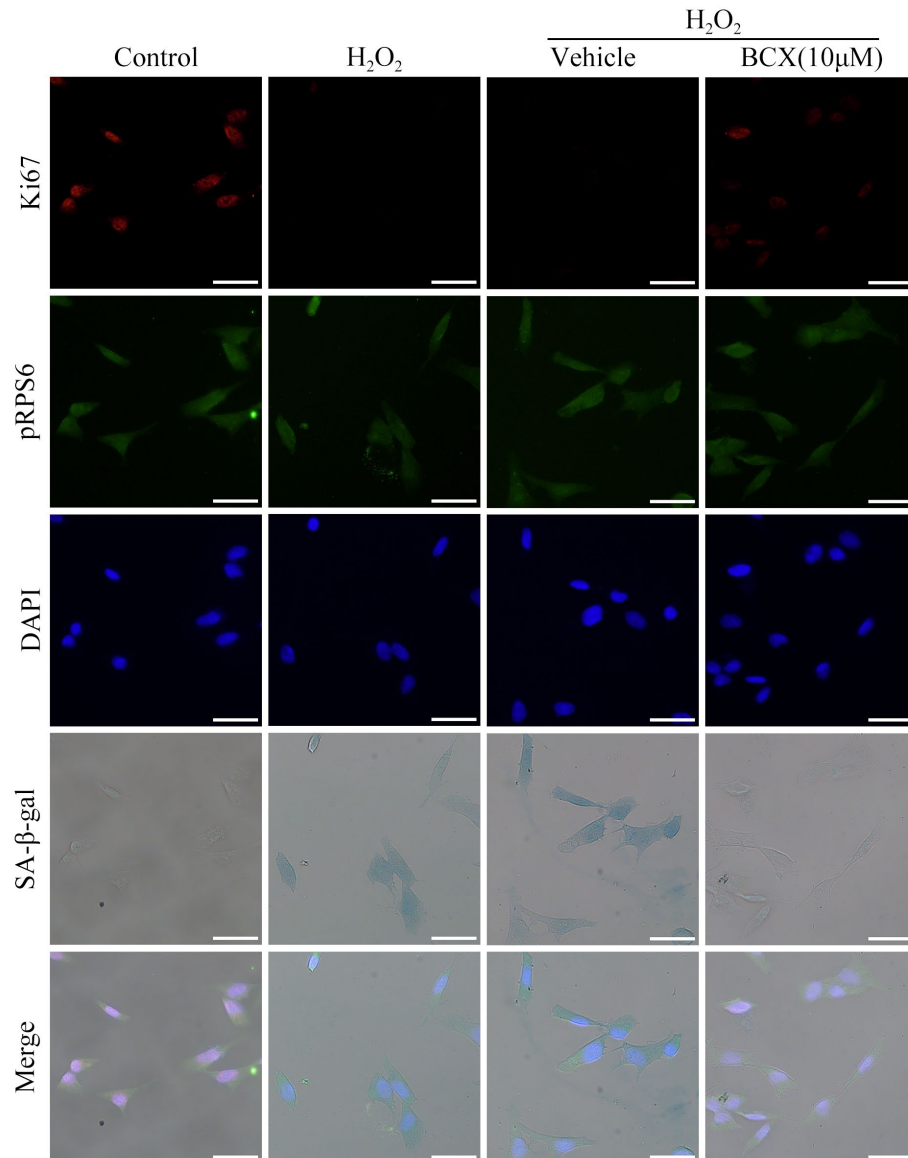

**Supplementary Figure S3. The representative images of Ki67, pRPS6, DAPI, and SA-β-galactosidase.** After pretreatment with BCX (10 μM) for 24 h, HK-2 cells were treated with 800 μM H<sub>2</sub>O<sub>2</sub> for 48 h. SA-β-galactosidase staining was first performed on HK-2 cells. Then the expression of Ki67 and pRPS6 was detected by immunofluorescence technique. Scale bar = 40 μm.
